# Supplementary material for: Regiospecific synthesis of functionalised 1,3-diarylisobenzofurans via palladium- and rhodium-catalysed reaction of boronic acids with o-acylbenzaldehydes under thermal or microwave activation
Source: Royal Society of Chemistry journal article supplement (doi:10.1039/c0ob00110d), 2010-01-01

**Regiospecific synthesis of functionalised 1,3-diarylisobenzofurans *via* palladium- and rhodium-catalysed reaction of boronic acids with *o*-acylbenzaldehydes under thermal or microwave activation†**

**Jérôme Jacq, Bernard Bessières, Cathy Einhorn and Jacques Einhorn\***

<sup>1</sup>H and <sup>13</sup>C NMR spectra of compounds **3c**, **3h**, **3i** and **8** follow.

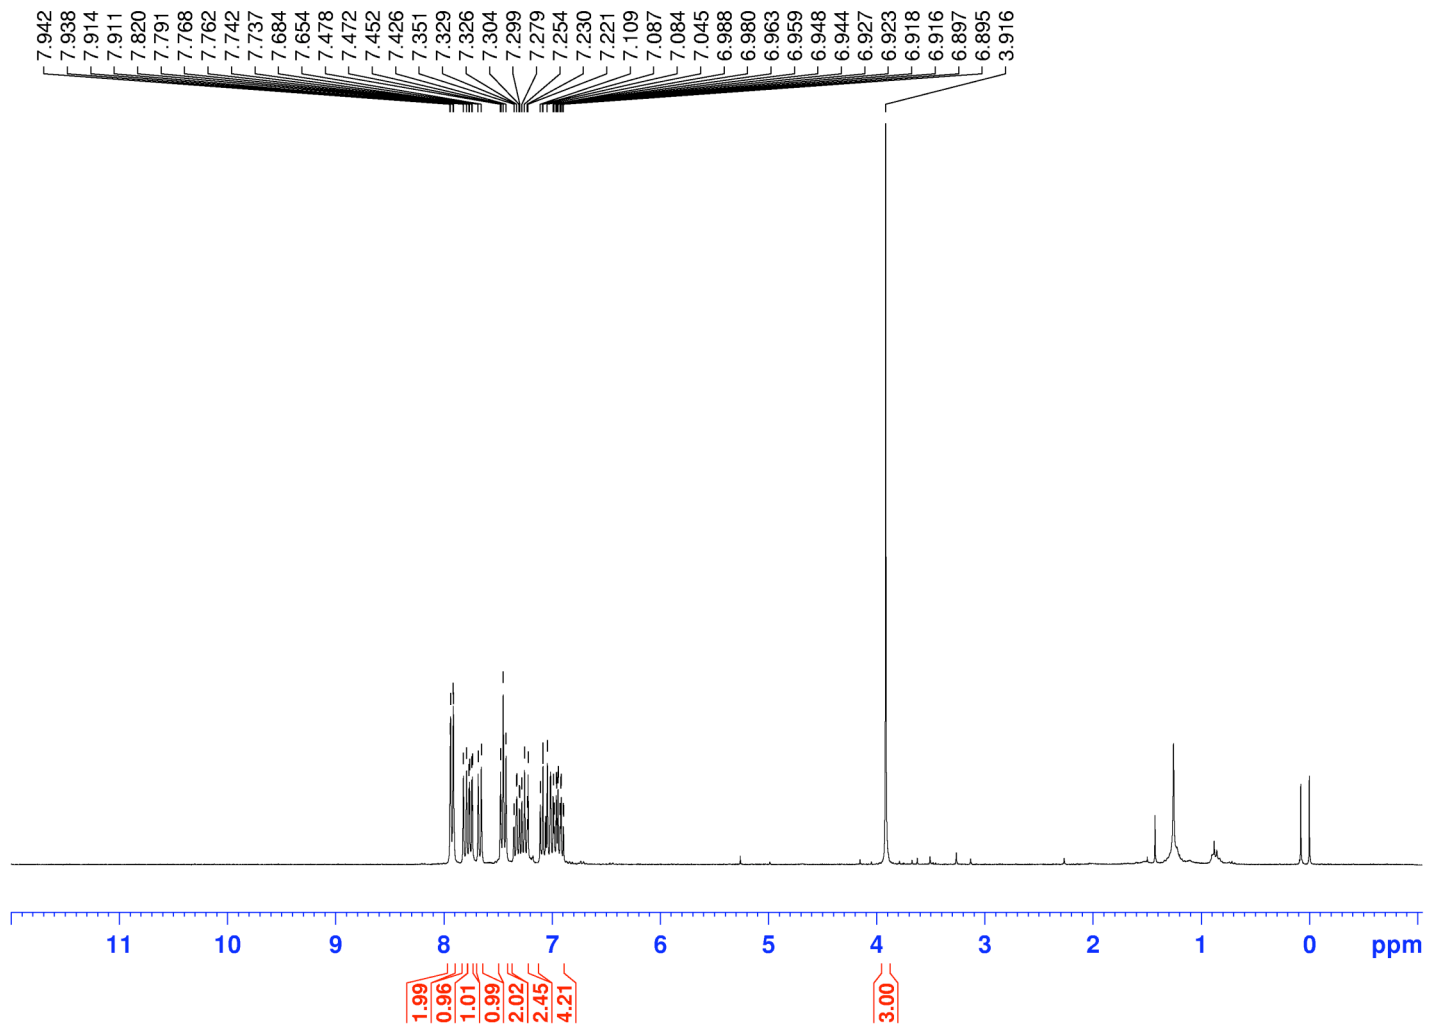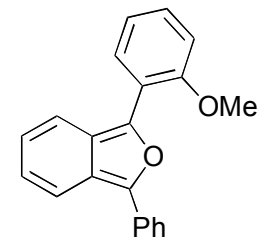

**3c**  
<sup>1</sup>H RMN  
300 MHz, CDCl<sub>3</sub>

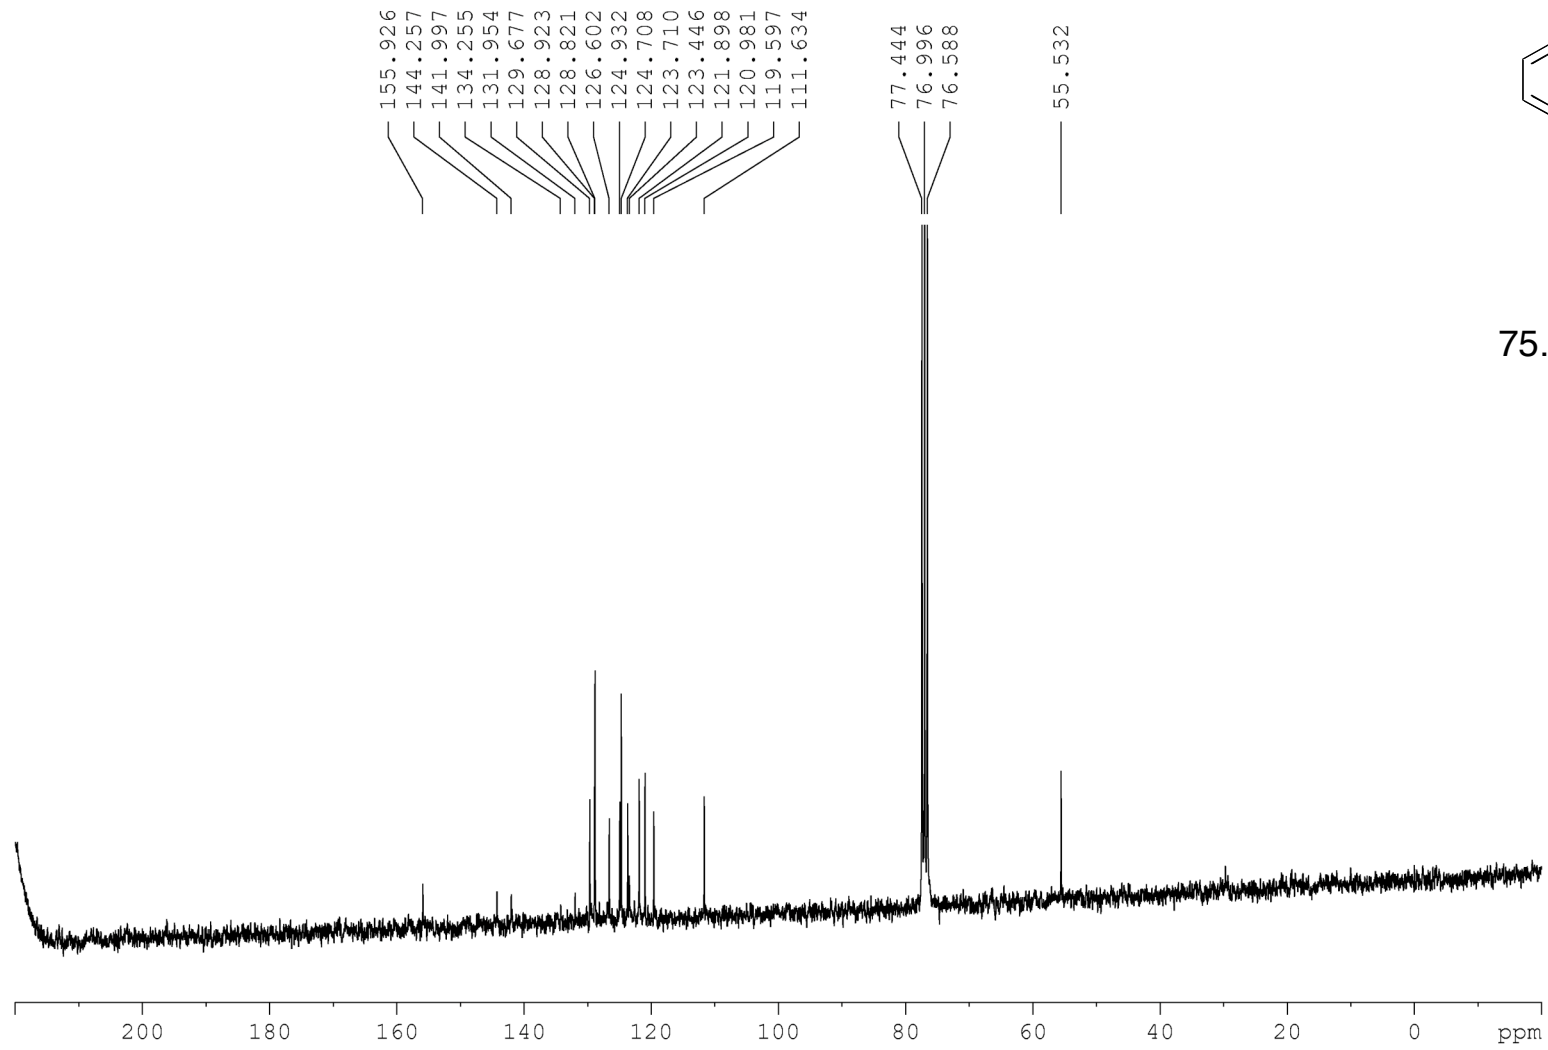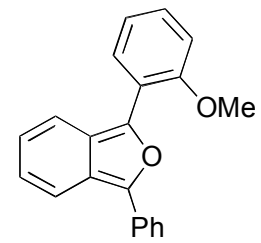

**3c**  
<sup>13</sup>C RMN  
75.5 MHz, CDCl<sub>3</sub>

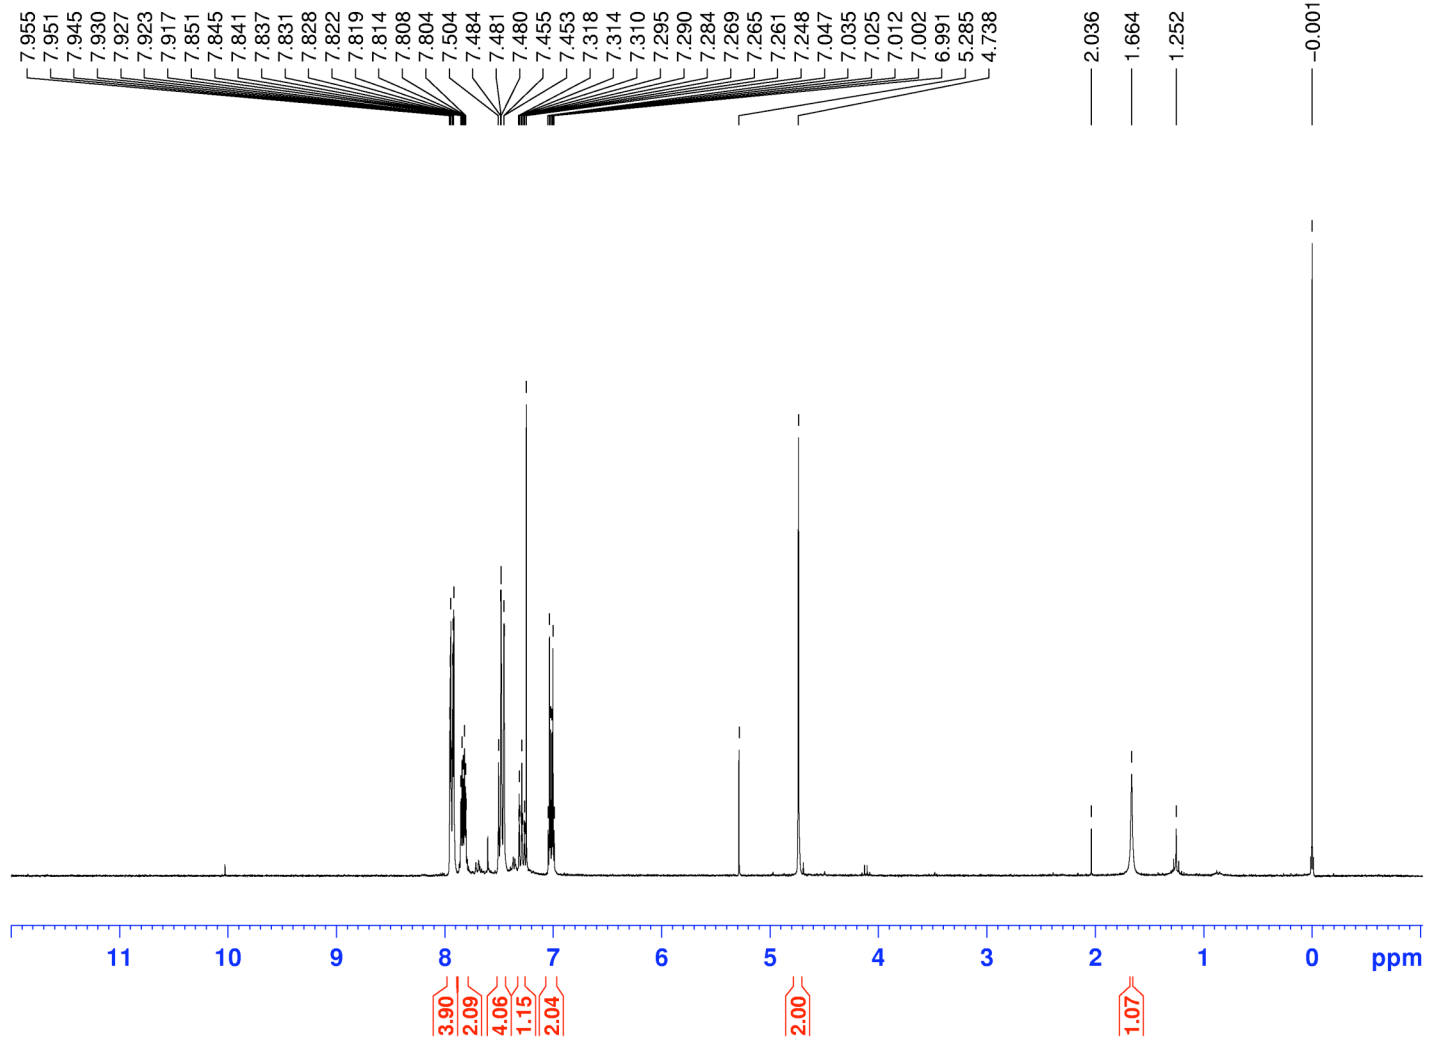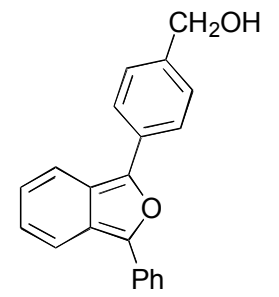

**3h**  
<sup>1</sup>H RMN  
300 MHz, CDCl<sub>3</sub>

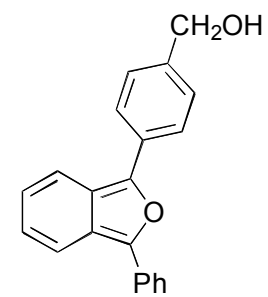

**3h**  
<sup>13</sup>C RMN  
75.5 MHz, CDCl<sub>3</sub>

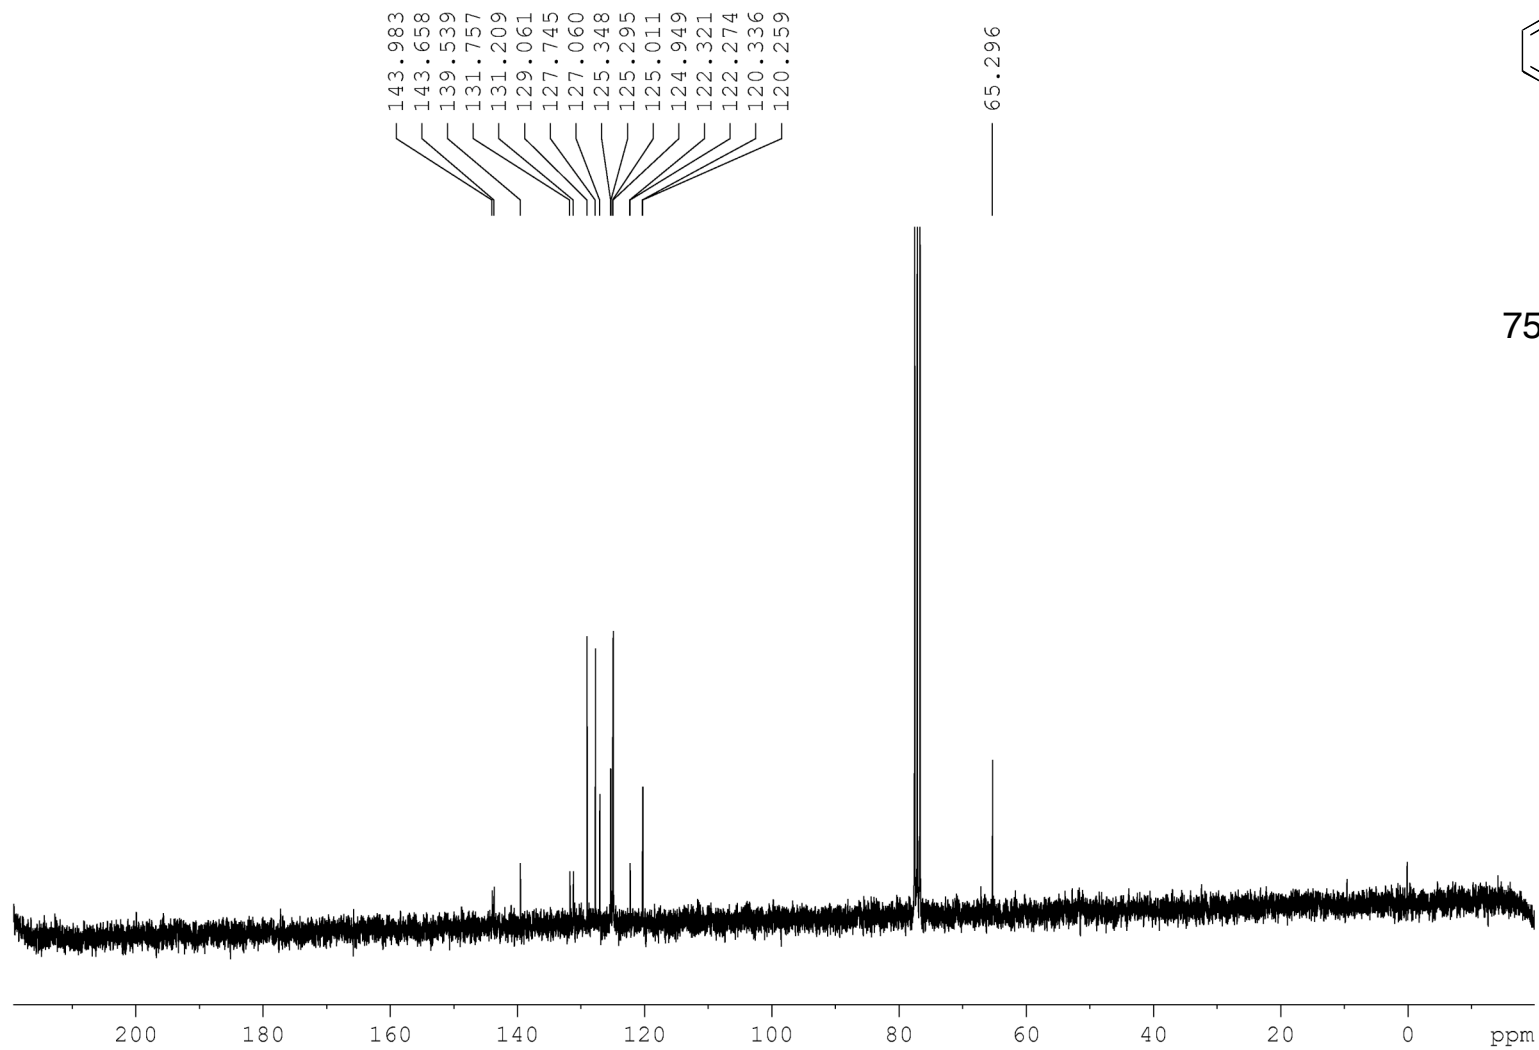

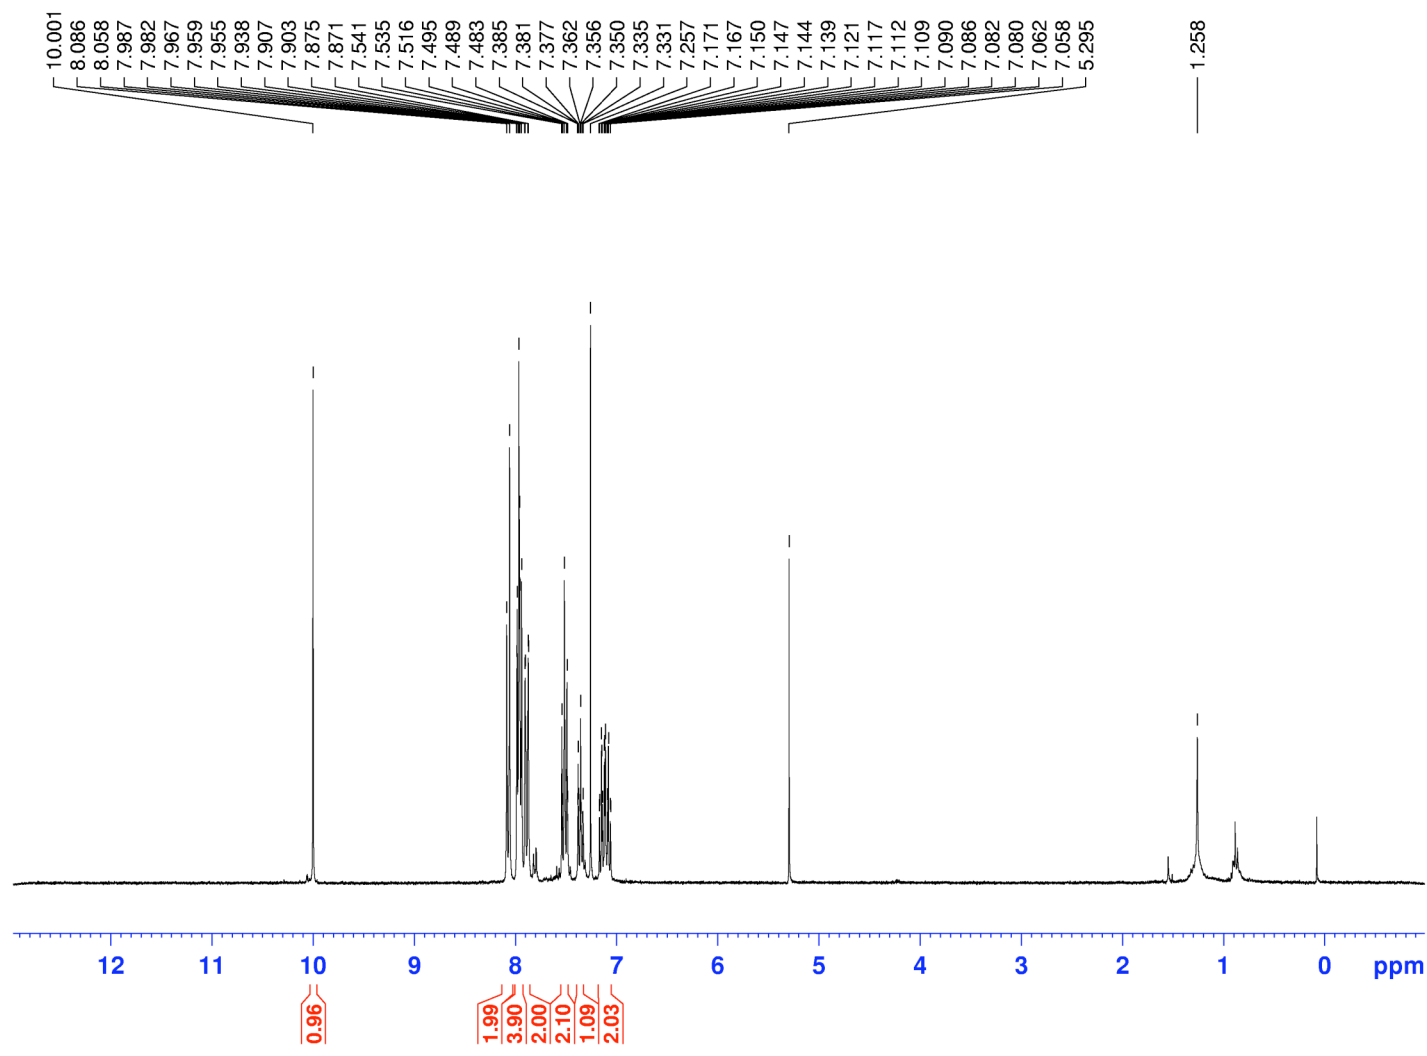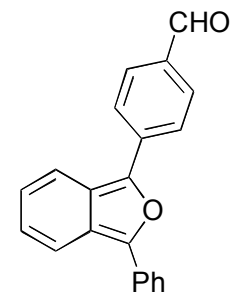

**3i**  
<sup>1</sup>H RMN  
 300 MHz, CDCl<sub>3</sub>

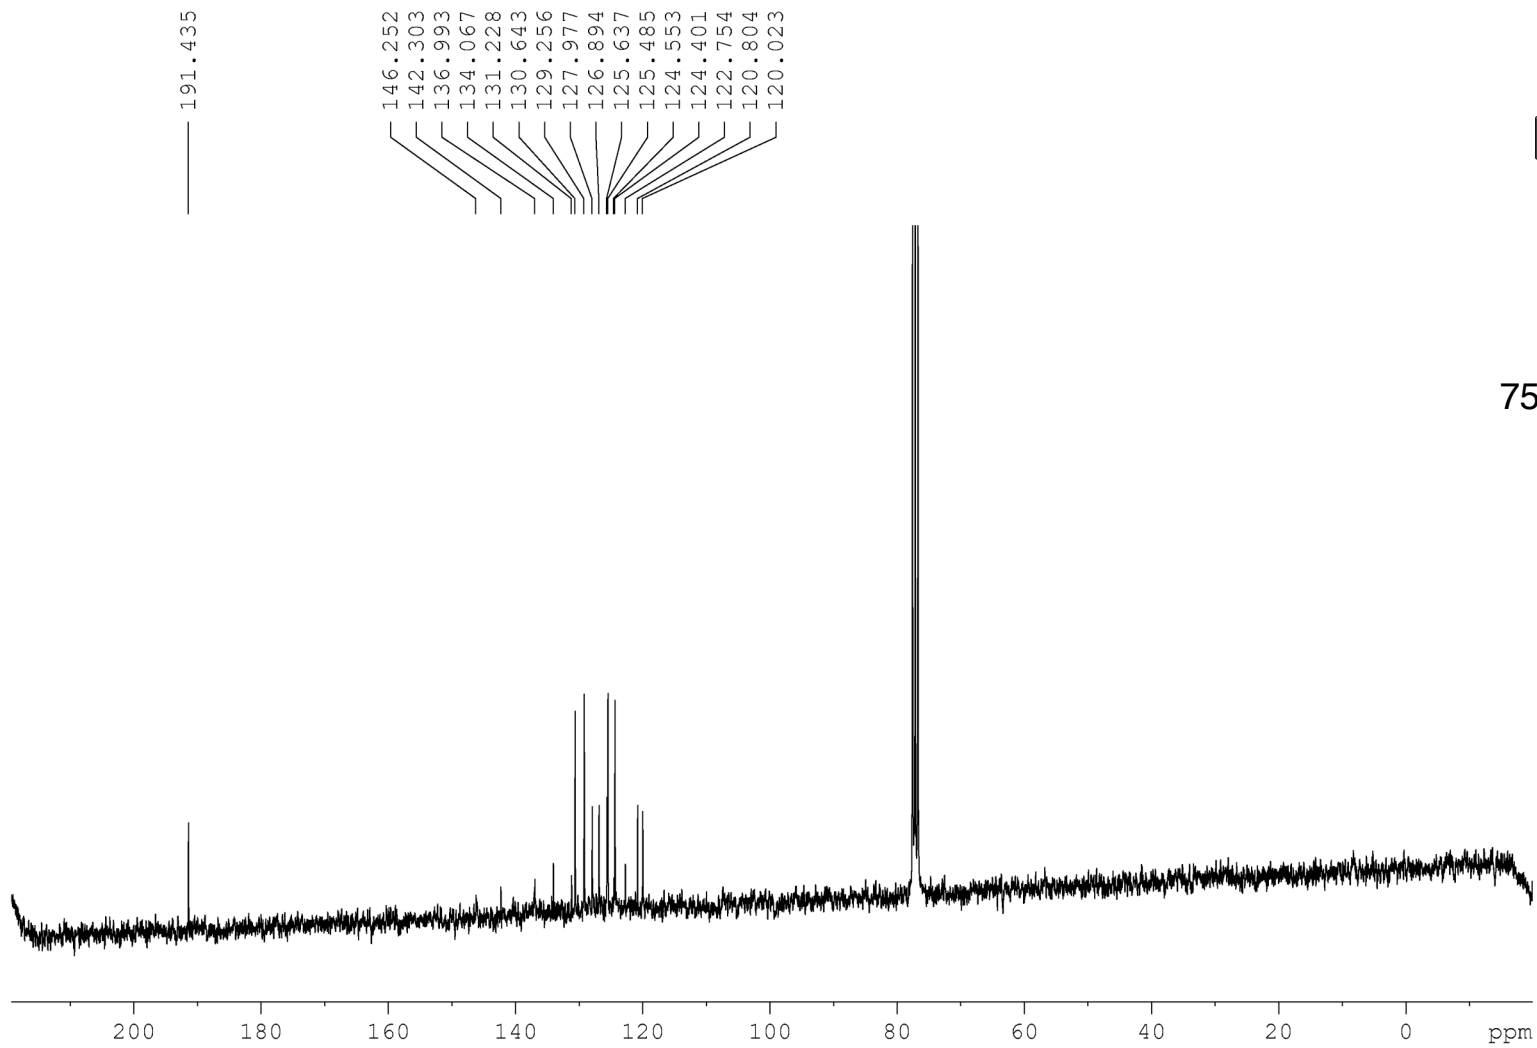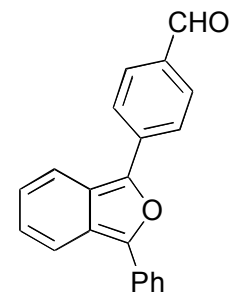

**3i**  
<sup>13</sup>C RMN  
75.5 MHz, CDCl<sub>3</sub>

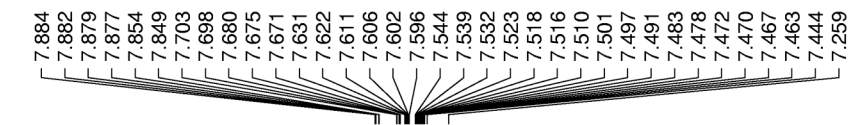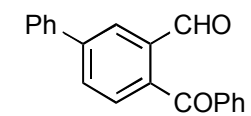

**8**  
<sup>1</sup>H RMN  
300 MHz, CDCl<sub>3</sub>

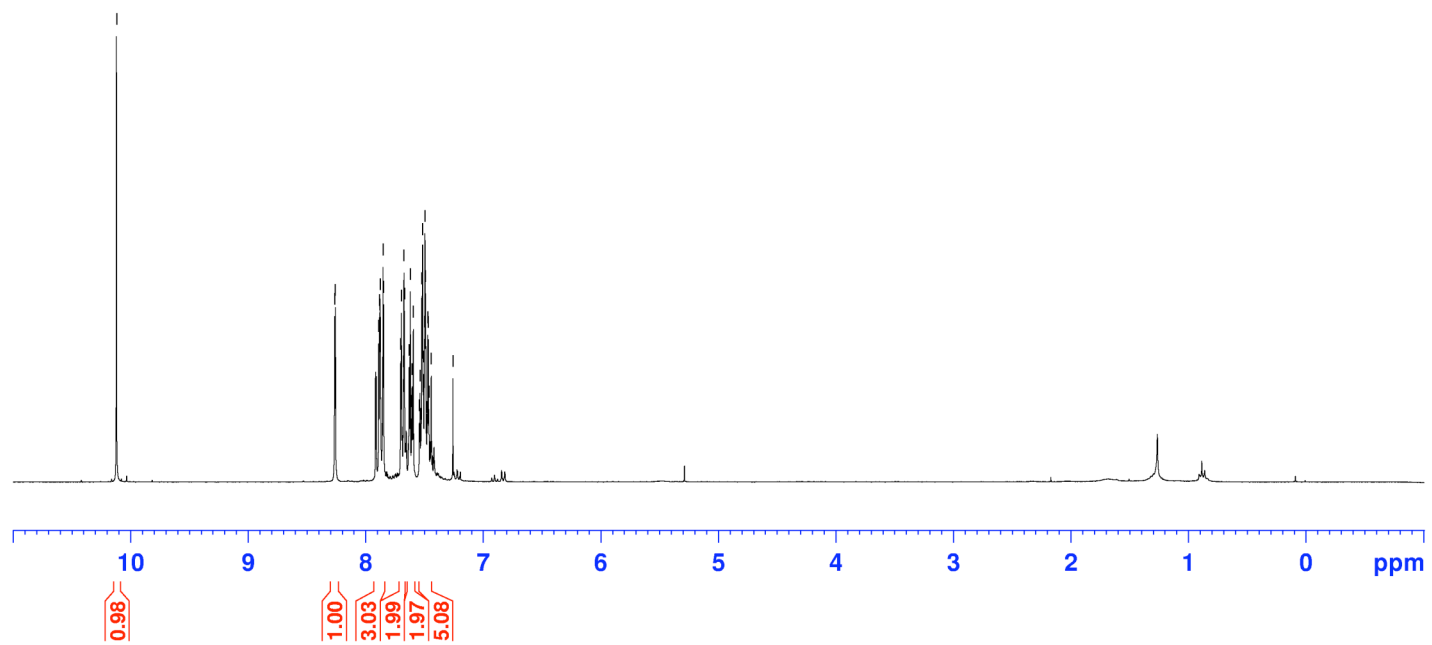



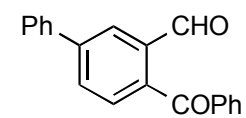

**8**

<sup>13</sup>C RMN  
75.5 MHz, CDCl<sub>3</sub>

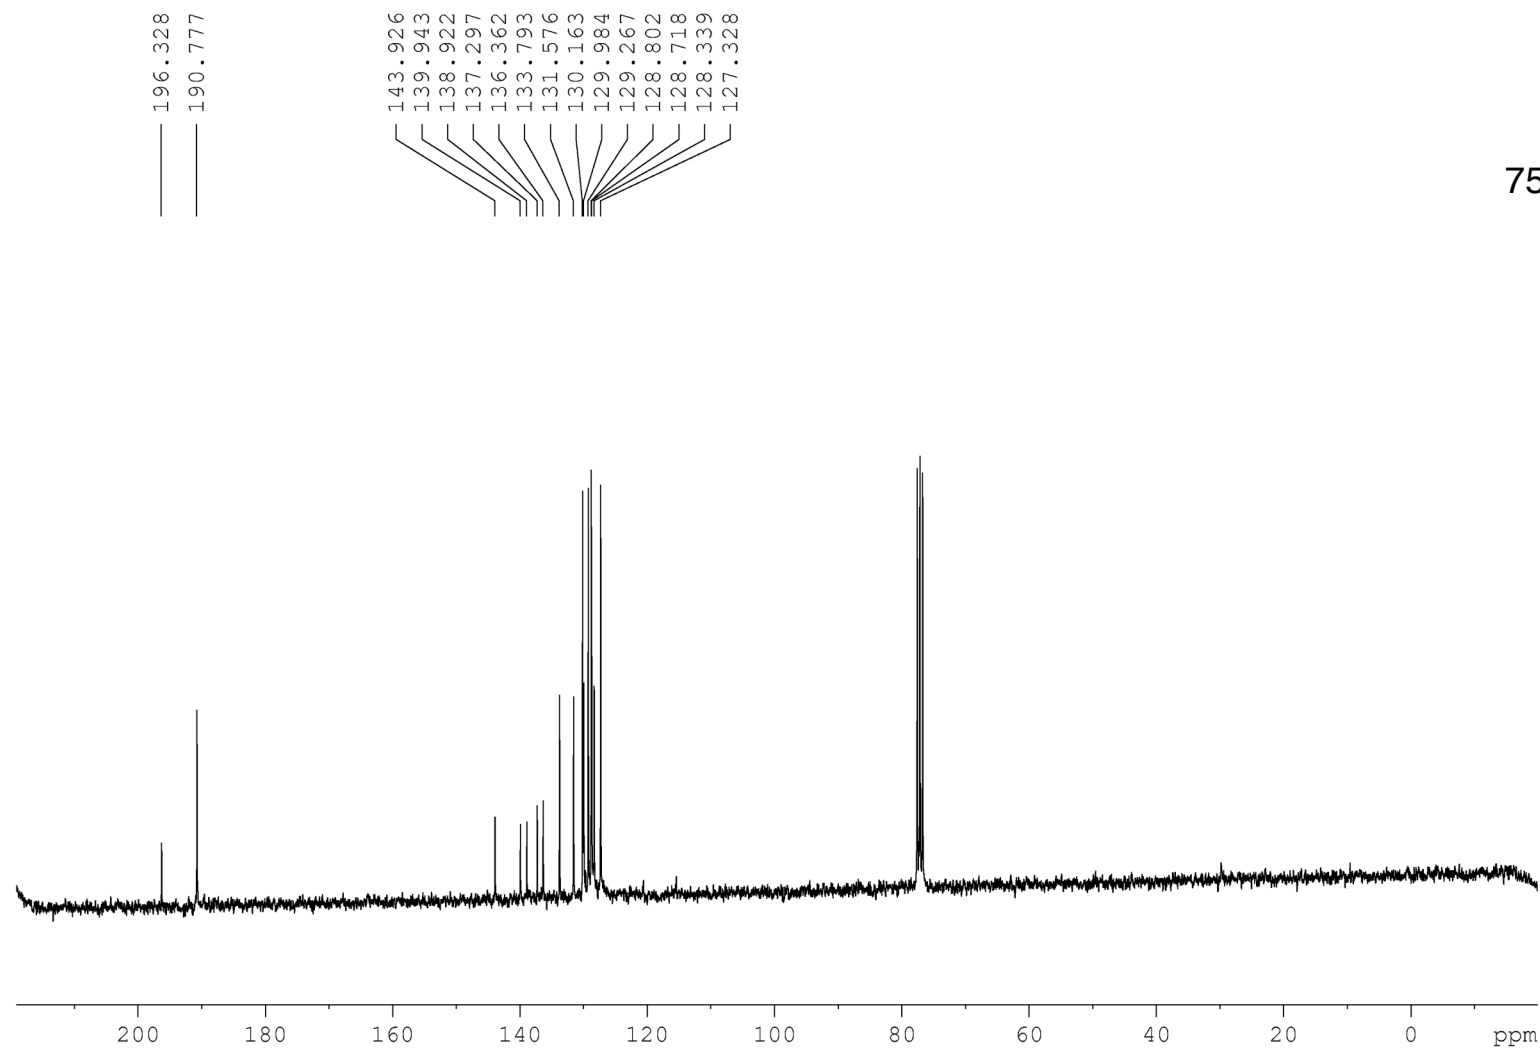

Supplement: c0ob00110d.pdf [file c0ob00110d.pdf]
